# Supplementary material for: In situ solvent and counteranion-induced synthesis, structural characterization and photoluminescence properties of Pb-based MOFs
Source: Royal Society of Chemistry journal article supplement (doi:10.1039/c4nj01506a), 2014-10-20
Supplement: c4nj01506a1.pdf [file c4nj01506a1.pdf]

**In situ solvent and counteranion-induced synthesis, structural  
characterization and photoluminescence properties of Pb-based MOFs**

**Qi-Bing Bo,\* Juan-Juan Pang, Hong-Yan Wang and Zhen-Wei Zhang**

*School of Chemistry and Chemical Engineering, University of Jinan, Jinan 250022 (China)*

\*Email: [chm\\_boqb@ujn.edu.cn](mailto:chm_boqb@ujn.edu.cn)

**Electronic Supplementary Information (ESI)**

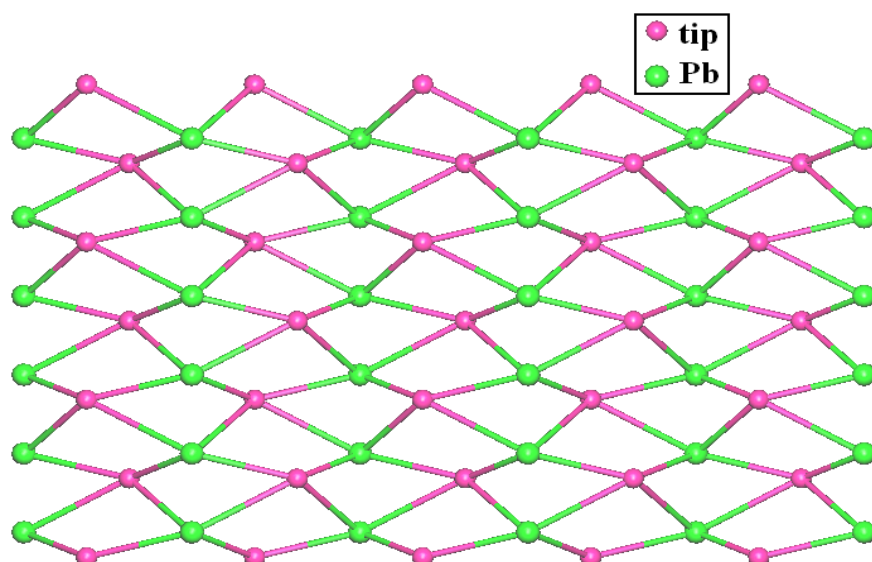

ESI 1 Schematic description of the equivalent 2D topology framework with a uninodal **sql**-type topological motif considering the Pb and tip ligand as connected nodes. Color codes: mauve for the organic 4-connected nodes, green for inorganic 4-connected nodes.

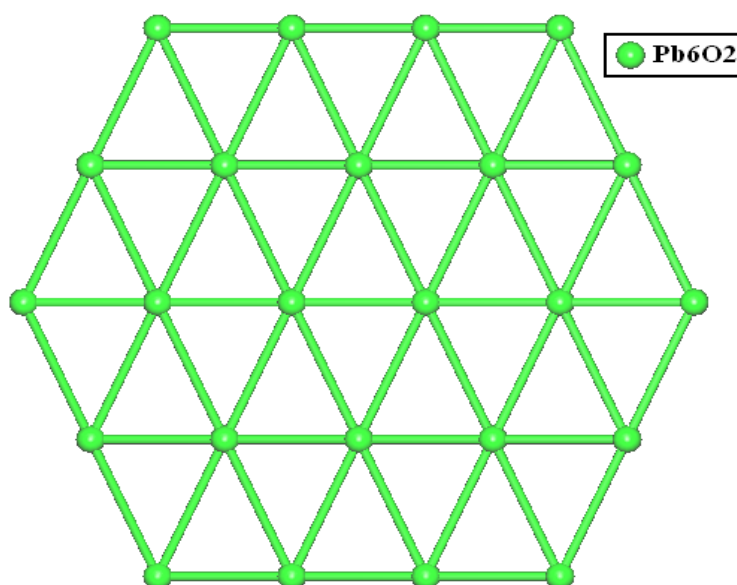

ESI 2 Schematic description of the equivalent 2D topology framework with a uninodal **hxl**-type topological motif considering the  $\text{Pb}_6\text{O}_2$  clusters and tip ligands as nodes and linkers, respectively. Color codes: 2-connected tip linkers are omitted, green for inorganic 6-connected  $\text{Pb}_6\text{O}_2$  cluster nodes.

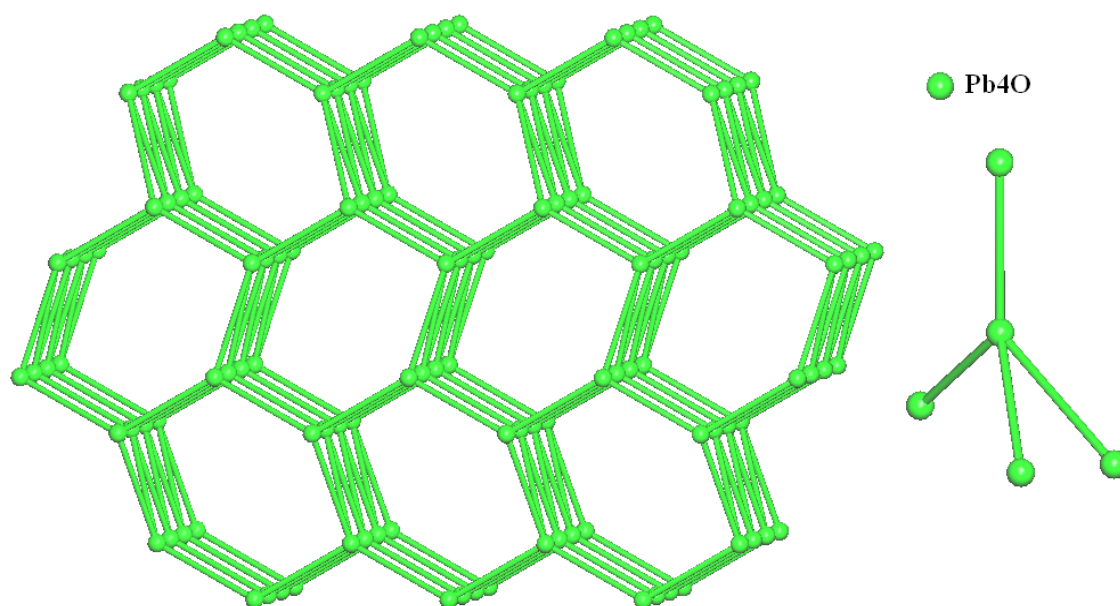

ESI 3 Schematic description of the equivalent 3D topology framework with a uninodal **dia**-type topological motif considering the Pb<sub>4</sub>O clusters and tip ligands as nodes and linkers, respectively. Color codes: 2-connected tip linkers are omitted, green for inorganic 4-connected Pb<sub>4</sub>O cluster nodes.

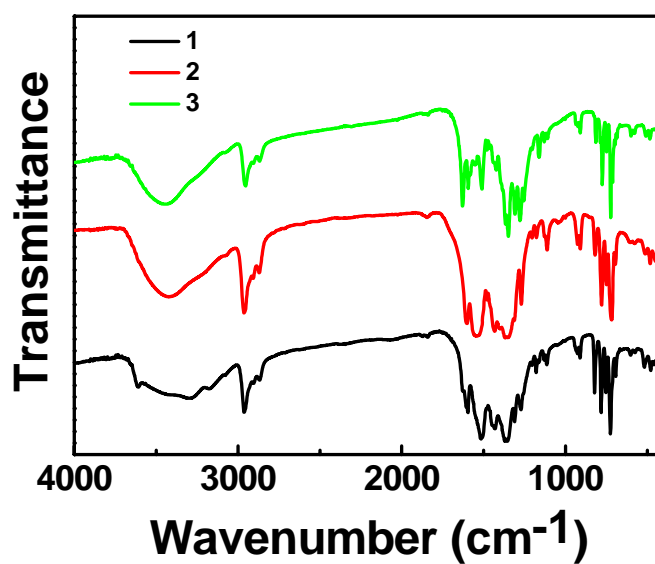

ESI 4 FT-IR spectra for **1**, **2** and **3**.

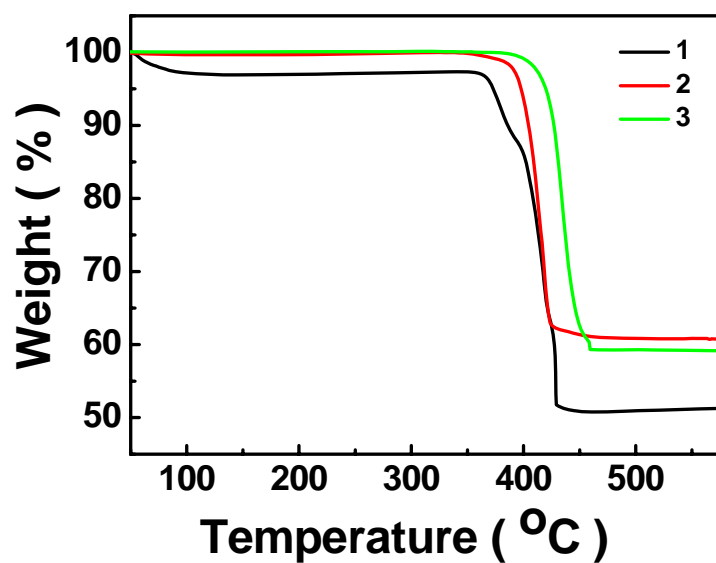

ESI 5 TG curves for **1**, **2** and **3**

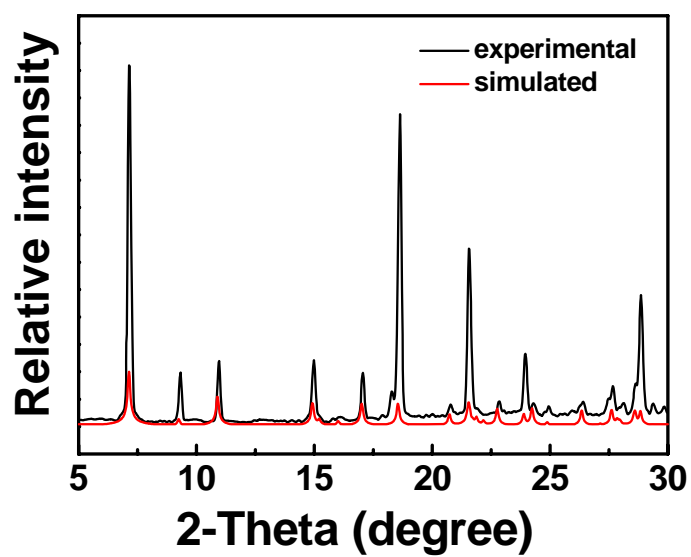

ESI 6 (a) The experimental and simulated PXRD patterns for **1**. The top is the experimental pattern, and the bottom is the simulated one.

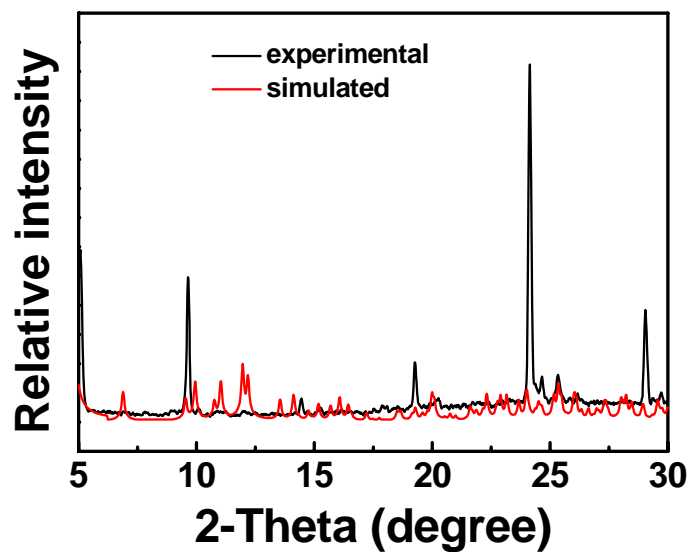

ESI 6 (b) The experimental and simulated PXRD patterns for **2**. The top is the experimental pattern, and the bottom is the simulated one.

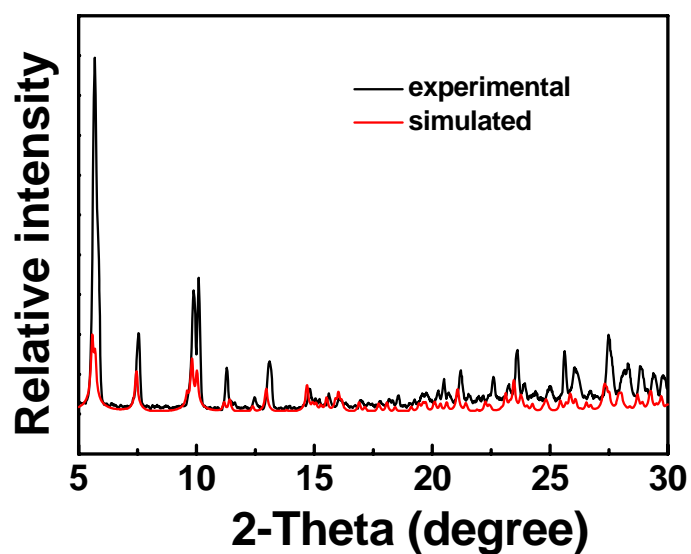

ESI 6 (c) The experimental and simulated PXRD patterns for **3**. The top is the experimental pattern, and the bottom is the simulated one.

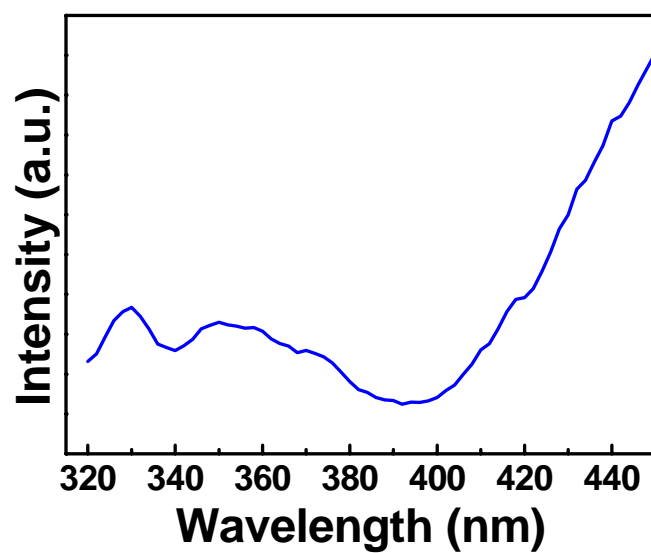

ESI 7 The excitation spectrum for **1**, monitored at 527 nm.

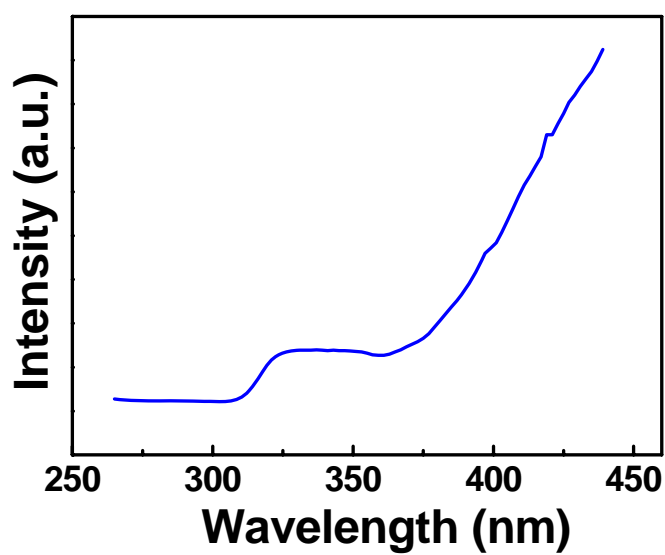

ESI 8 The excitation spectrum for **2**, monitored at 568 nm.

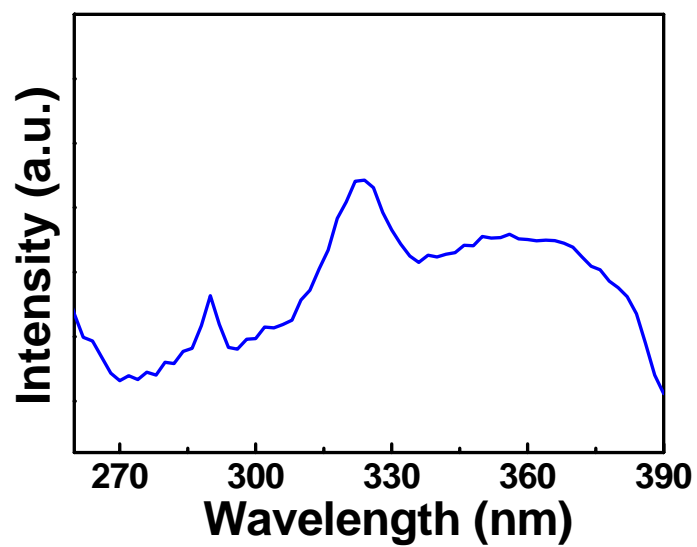

ESI 9 The excitation spectrum for **3**, monitored at 416 nm.
